# Supplementary material
Source: PubMed Central journal article supplement (PMC6662638)
Supplement: NIHMS1522228-supplement-Supplemental_Material.pdf [file NIHMS1522228-supplement-Supplemental_Material.pdf]

**SUPPLEMENTAL MATERIAL**

**Supplemental Table I: Longitudinal Association of Incident Atrial Fibrillation (AF) with Brain MRI Abnormalities in the ARIC Ancillary MRI Substudy, 1993-2006, Excluding Participants with Subclinical Cerebral Infarctions**

| Brain MRI Variable                 | No AF (n=694) | AF (n=14) | Model 1                                                                                 |      | Model 2             |      |
|------------------------------------|---------------|-----------|-----------------------------------------------------------------------------------------|------|---------------------|------|
|                                    | N (%)         | N (%)     | Odds Ratio (95% CI)                                                                     | P    | Odds Ratio (95% CI) | P    |
| <b>Worsening Sulcal Grade</b>      | 464 (67%)     | 12 (86%)  | 2.70 (0.59-12.5)                                                                        | 0.20 | 2.42 (0.50-11.7)    | 0.27 |
| <b>Worsening Ventricular Grade</b> | 511 (74%)     | 14 (100%) | Not able to be estimated since all participants with AF had worsening ventricular grade |      |                     |      |

Logistic regression was used for dichotomous outcomes to calculate odds ratios.

Model 1: Adjusted for age, race and sex

Model 2: Adjusted for age, race, sex, center, education, occupation, cigarette smoking, body mass index, hypertension, diabetes, prevalent coronary heart disease, prevalent congestive heart failure, anticoagulant medication use

MRI=Magnetic Resonance Imaging, SD= Standard Deviation, cm<sup>3</sup>= Cubic Centimeters

**Supplemental Table II: Cross-Sectional Association of Prevalent Atrial Fibrillation (AF) with Brain MRI Abnormalities in the ARIC Ancillary MRI Substudy, 2004-2006, Excluding Participants with Subclinical Cerebral Infarctions**

| Brain MRI Variable                                        | No AF (n=722) | AF (n=20)  | Model 1             |      | Model 2             |      |
|-----------------------------------------------------------|---------------|------------|---------------------|------|---------------------|------|
|                                                           | Mean (SD)     | Mean (SD)  | Difference (95% CI) | P    | Difference (95% CI) | P    |
| <b>White Matter Hyperintensity Volume, cm<sup>3</sup></b> | 11.2 (9.7)    | 9.7 (5.3)  | -2.1 (-6.2-2.0)     | 0.31 | -3.3 (-7.5-0.89)    | 0.12 |
| <b>Total Brain Volume, cm<sup>3*</sup></b>                | 1054 (107)    | 1033 (101) | -14.7 (-36.9-7.5)   | 0.19 | -14.9 (-37.8-8.0)   | 0.20 |
|                                                           | N (%)         | N (%)      | Odds Ratio (95% CI) | P    | Odds Ratio (95% CI) | P    |
| <b>Sulcal Grade <math>\geq 4</math></b>                   | 246 (35%)     | 12 (60%)   | 2.1 (0.81-5.3)      | 0.13 | 2.2 (0.81-6.0)      | 0.12 |
| <b>Ventricular Grade <math>\geq 4</math></b>              | 328 (47%)     | 13 (65%)   | 1.6 (0.60-4.1)      | 0.36 | 2.1 (0.73-6.1)      | 0.16 |

Linear regression was used for continuous outcomes to calculate differences, and logistic regression for dichotomous outcomes to calculate odds ratios.

Model 1: Adjusted for age, race and sex

Model 2: Adjusted for age, race, sex, center, education, occupation, cigarette smoking, body mass index, hypertension, diabetes, prevalent coronary heart disease, prevalent congestive heart failure, anticoagulant medication use

\*Additionally adjusted for intracranial volume.

MRI=Magnetic Resonance Imaging, SD= Standard Deviation, cm<sup>3</sup>= Cubic Centimeter
